## EDITORIAL NOTE

# Editorial Note: A panel data study on the effect of climate change on life expectancy

The *PLOS Climate* Editors

After this article [1] was published, concerns were raised about the reliability of global mean annual temperature data that are discussed in the article and used in the study's analyses. The source of these data is reported as [2] in the article's Materials and methods section, and as [3] in the Fig 4 legend.

*PLOS Climate* is looking into the concerns that have been raised. Meanwhile, readers are advised to interpret this article's results with caution.

## References

1. Roy A (2024) A panel data study on the effect of climate change on life expectancy. *PLOS Clim* 3(1): e0000339. <https://doi.org/10.1371/journal.pclm.0000339>
2. World Bank. The Climate Change Knowledge Portal (CCKP) 2023. The World Bank; 2023. <https://climateknowledgeportal.worldbank.org/>
3. Akhtar R, Palagiano C. Climate change and air pollution: an introduction. *Climate Change and Air Pollution: The Impact on Human Health in Developed and Developing Countries*. 2018:3–8.

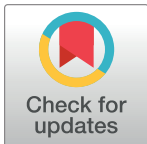

## OPEN ACCESS

**Citation:** The *PLOS Climate* Editors (2024) Editorial Note: A panel data study on the effect of climate change on life expectancy. *PLOS Clim* 3(1): e0000368. <https://doi.org/10.1371/journal.pclm.0000368>

**Published:** January 24, 2024

**Copyright:** © 2024 The PLOS Climate Editors. This is an open access article distributed under the terms of the [Creative Commons Attribution License](https://creativecommons.org/licenses/by/4.0/), which permits unrestricted use, distribution, and reproduction in any medium, provided the original author and source are credited.
